# Supplementary material for: Modeled PFOA Exposure and Coronary Artery Disease, Hypertension, and High Cholesterol in Community and Worker Cohorts
Source: PubMed Central journal article supplement (PMC4256699; doi:10.1289/ehp.1307943), 2014-09-26
Supplement: ehp.1307943.s001.508.pdf [file ehp.1307943.s001.508.pdf]

## **Supplemental Material**

# **Modeled PFOA Exposure and Coronary Artery Disease, Hypertension, and High Cholesterol in Community and Worker Cohorts**

Andrea Winquist and Kyle Steenland

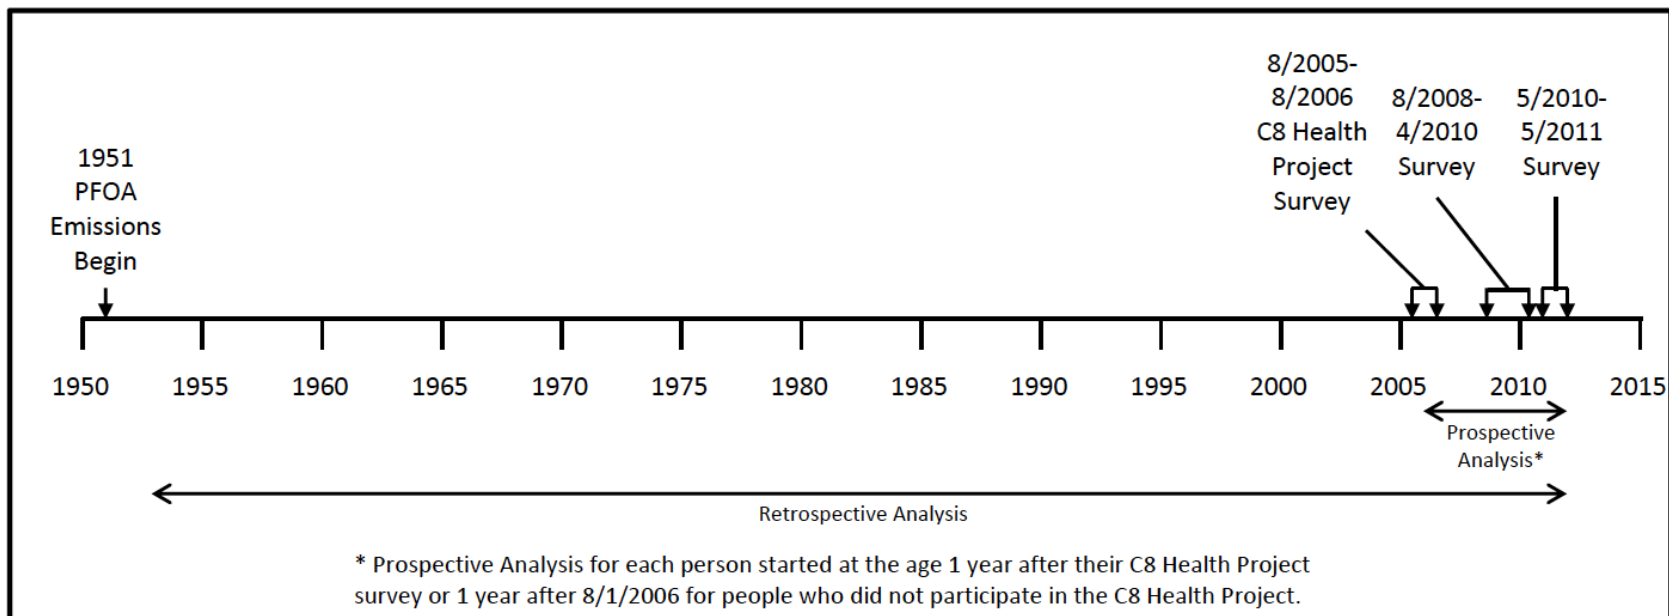

**Figure S1.** Timing of surveys and time periods covered by retrospective and prospective analyses.

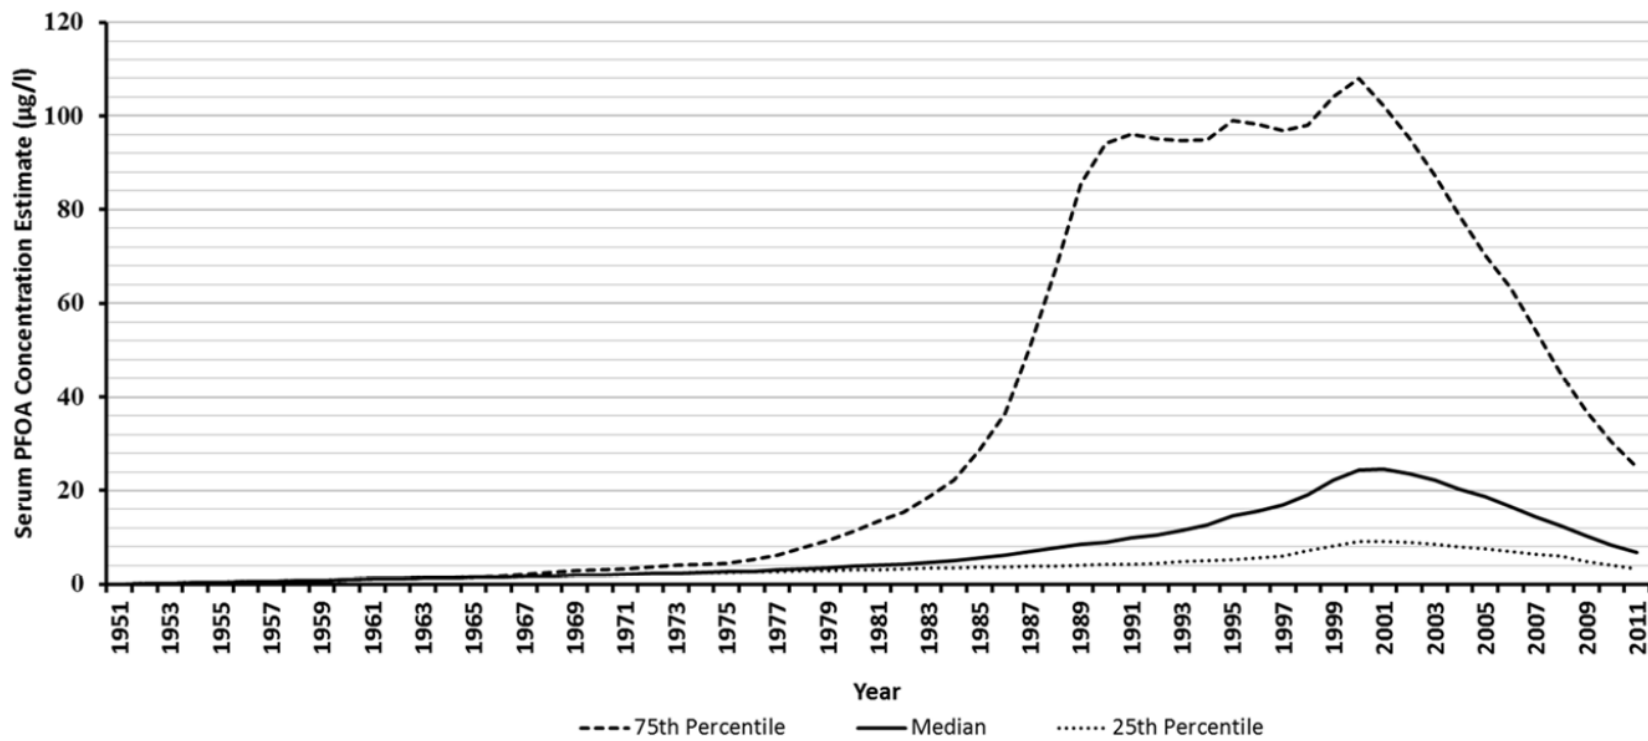

Figure S2. Retrospective Serum PFOA concentration estimates.

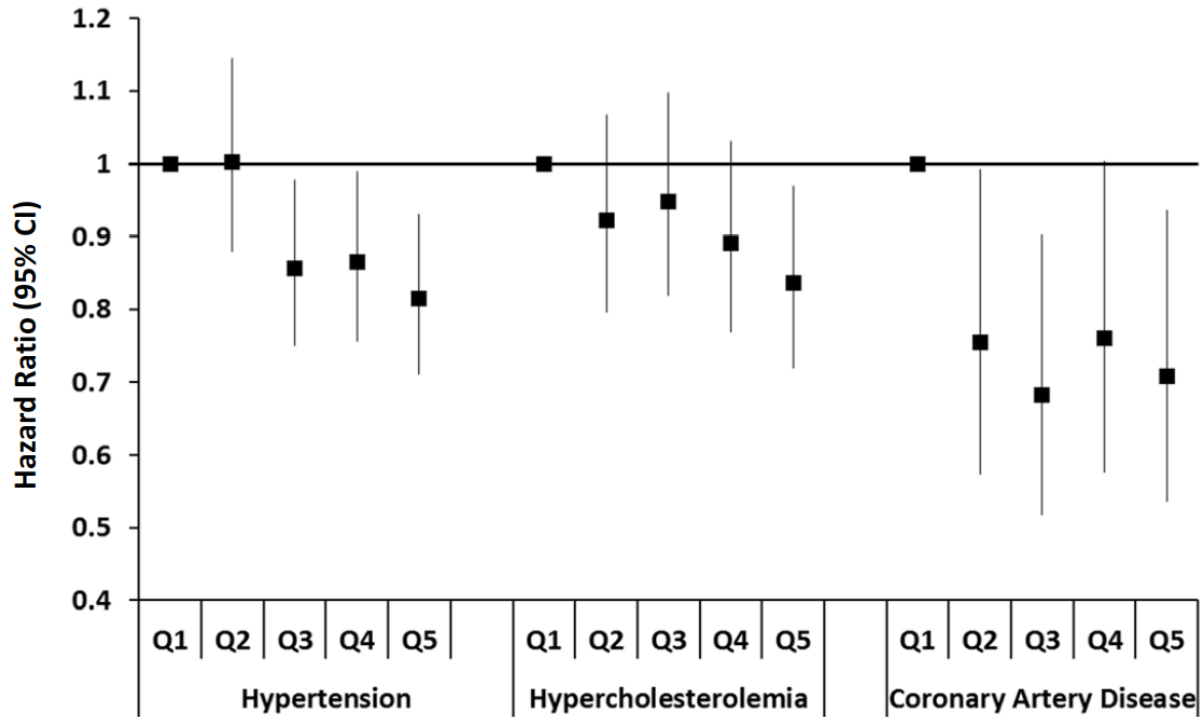

**Figure S3.** HR and 95% CI for prospective analysis, combined cohorts, cumulative exposure with Bayesian calibration, all ages, both genders. Quintile cut points (in  $\mu\text{g}/\text{ml}\cdot\text{yr}$ ) were: hypertension:  $<0.213$ ,  $0.213-<0.349$ ,  $0.349-<0.673$ ,  $0.673-<1.823$ ,  $\geq 1.823$ ; hypercholesterolemia:  $<0.215$ ,  $0.215-<0.352$ ,  $0.352-<0.656$ ,  $0.656-<1.763$ ,  $\geq 1.763$ ; coronary artery disease:  $<0.218$ ,  $0.218-<0.396$ ,  $0.396-<0.775$ ,  $0.775-<2.143$ ,  $\geq 2.143$ . Models were stratified by single-year birth year and controlled for gender and the interaction between gender and age. Models also controlled for years of schooling (not time-varying;  $<12$  years, high school diploma/GED, some college, or bachelor's degree or higher), race (white vs. non-white or missing), smoking (time-varying; current, former, none), smoking duration (time varying), smoking pack years (time-varying linear term created by multiplying the self-reported number of packs smoked per day by the smoking duration to that point), regular alcohol consumption (time-varying; current, former, none), BMI (at time of first study survey; underweight, normal, overweight, obese), and self-reported type 2 diabetes (time-varying according to reported age at diagnosis).

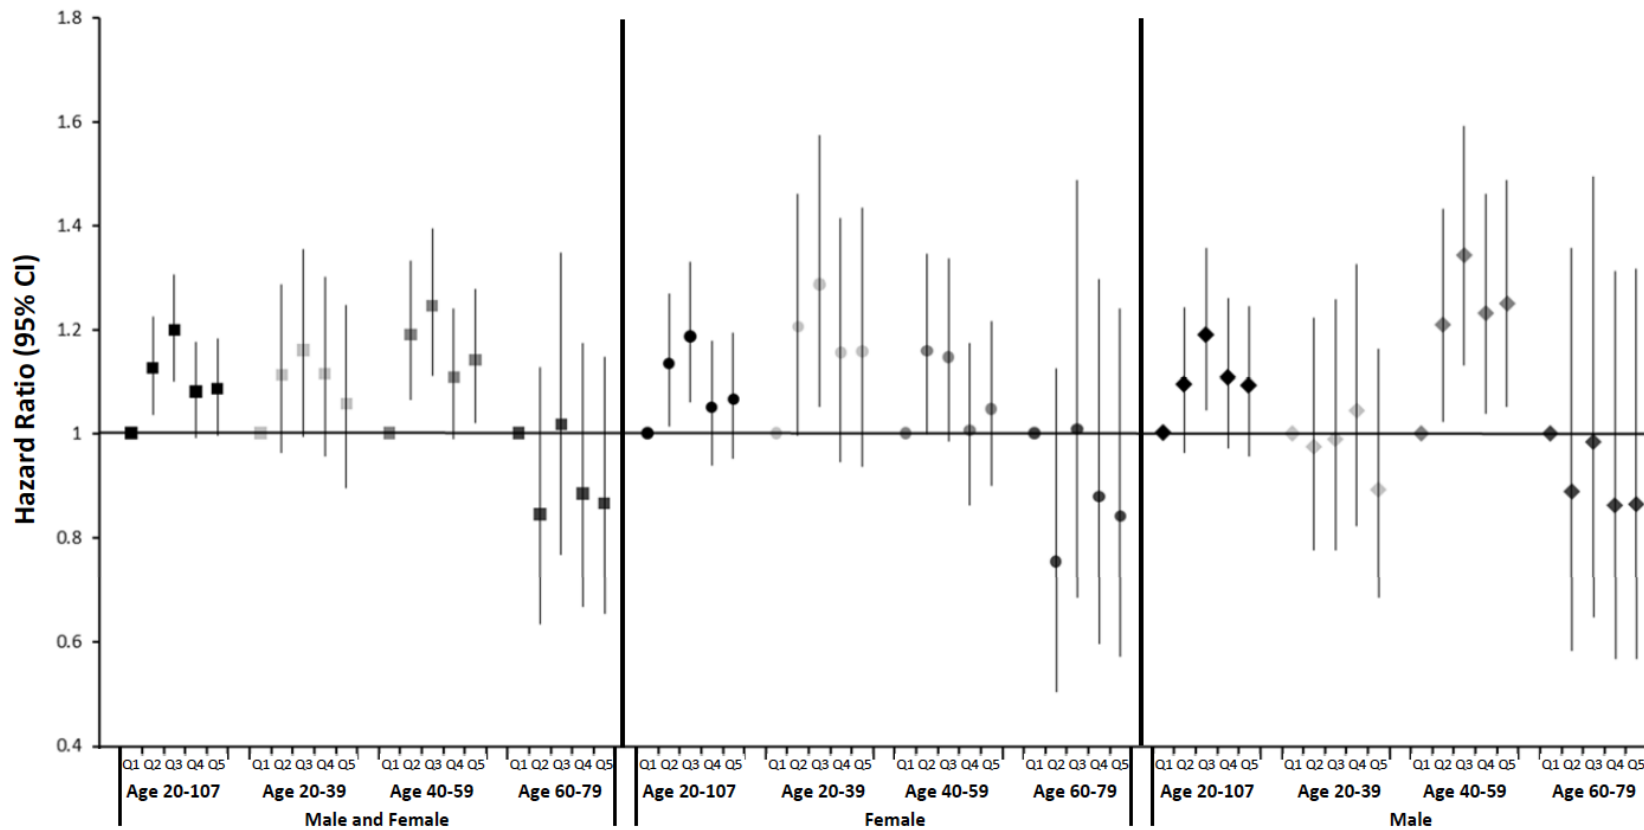

**Figure S4.** HR and 95% CI for hypertension, retrospective analysis, cumulative exposure, community cohort only. Models were stratified by single-year birth year and were either stratified by gender or controlled for gender and the interaction between gender and age. Models also controlled for years of schooling (not time-varying; <12 years, high school diploma/GED, some college, or bachelor’s degree or higher), race (white vs. non-white or missing), smoking (time-varying; current, former, none), smoking duration (time varying), smoking pack years (time-varying linear term created by multiplying the self-reported number of packs smoked per day by the smoking duration to that point), regular alcohol consumption (time-varying; current, former, none), BMI (at time of first study survey; underweight, normal, overweight, obese), and self-reported type 2 diabetes (time-varying according to reported age at diagnosis).

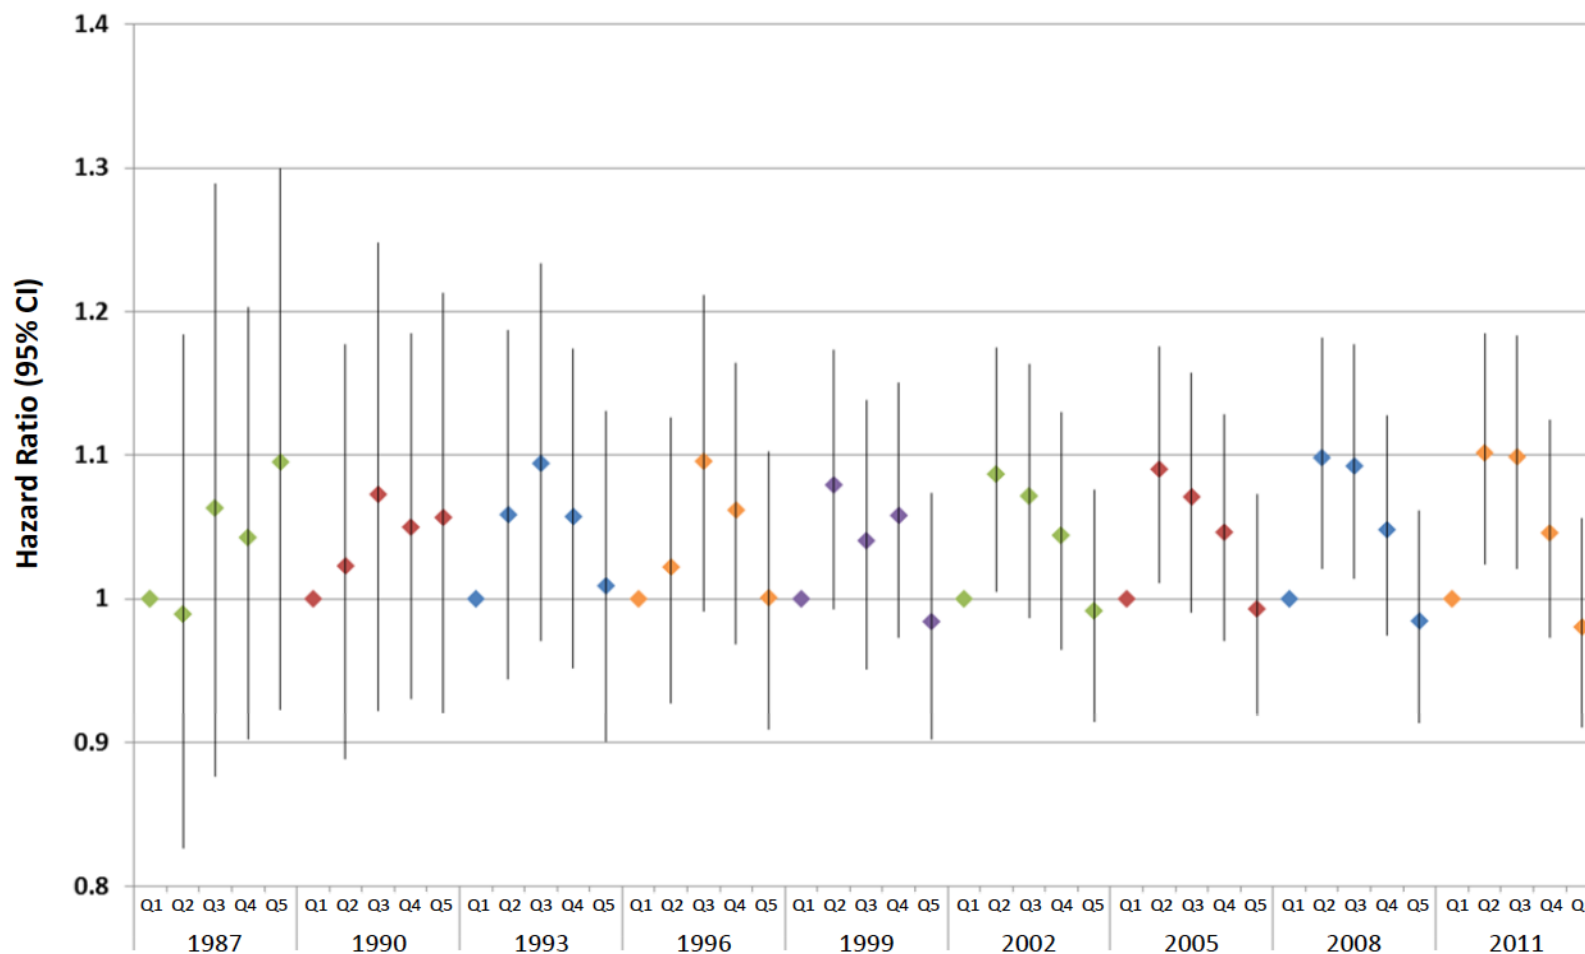

**Figure S5.** HR and 95% CI for hypertension, retrospective analysis, cumulative exposure, combined cohorts, both genders, all ages, varying end year. Models were stratified by single-year birth year and controlled for gender and the interaction between gender and age. Models also controlled for years of schooling (not time-varying; <12 years, high school diploma/GED, some college, or bachelor’s degree or higher), race (white vs. non-white or missing), smoking (time-varying; current, former, none), smoking duration (time varying), smoking pack years (time-varying linear term created by multiplying the self-reported number of packs smoked per day by the smoking duration to that point), regular alcohol consumption (time-varying; current, former, none), BMI (at time of first study survey; underweight, normal, overweight, obese), and self-reported type 2 diabetes (time-varying according to reported age at diagnosis).

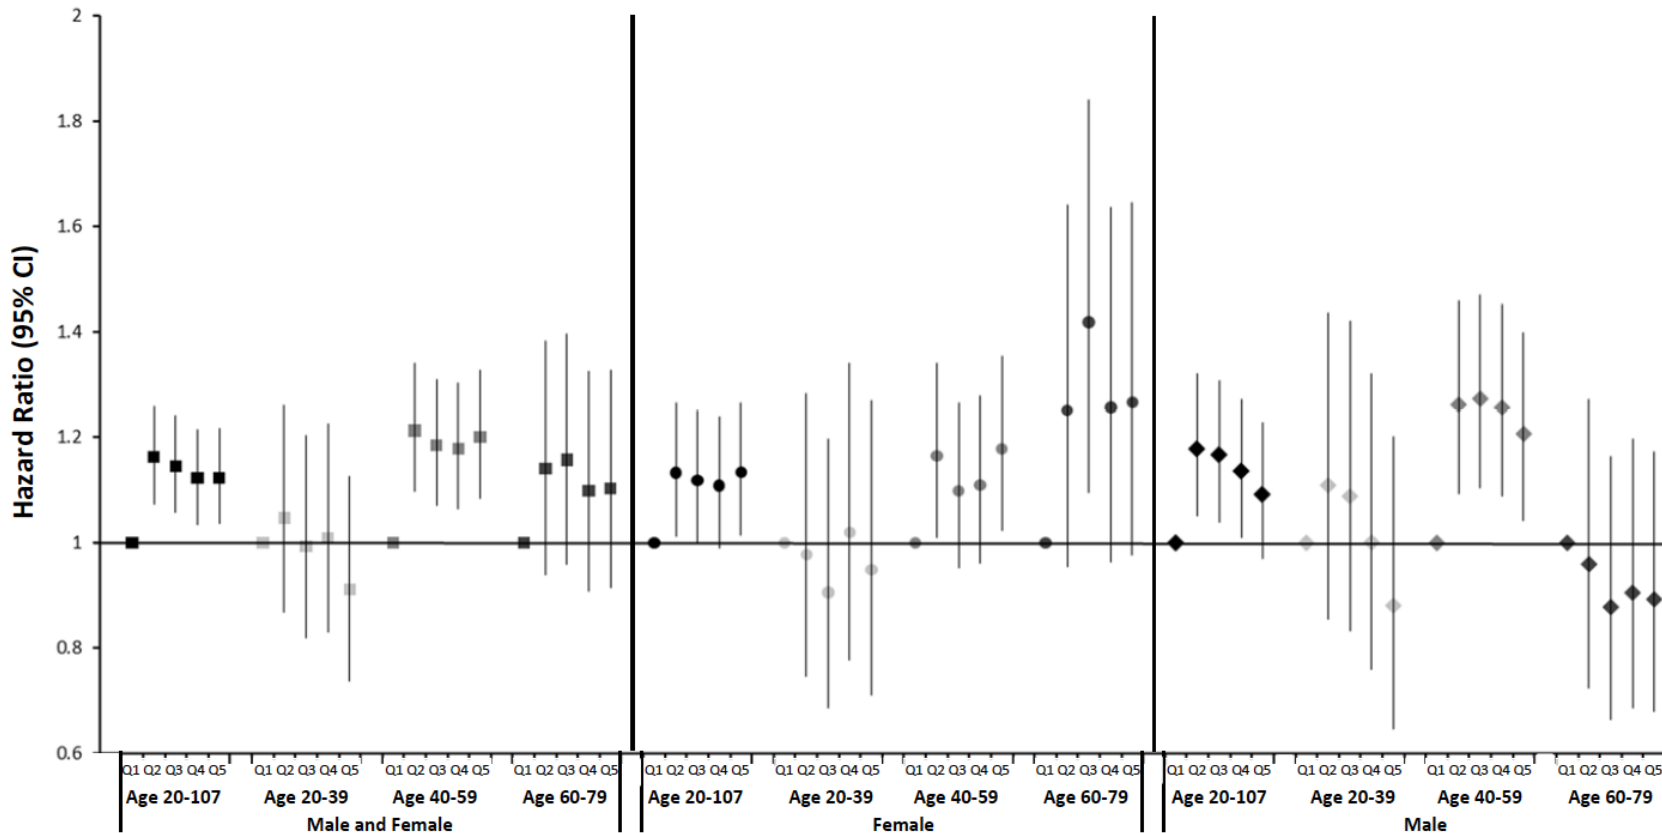

**Figure S6.** HR and 95% CI for hypercholesterolemia, retrospective analysis, cumulative exposure, community cohort only. Models were stratified by single-year birth year and were either stratified by gender or controlled for gender and the interaction between gender and age. Models also controlled for years of schooling (not time-varying; <12 years, high school diploma/GED, some college, or bachelor’s degree or higher), race (white vs. non-white or missing), smoking (time-varying; current, former, none), smoking duration (time varying), smoking pack years (time-varying linear term created by multiplying the self-reported number of packs smoked per day by the smoking duration to that point), regular alcohol consumption (time-varying; current, former, none), BMI (at time of first study survey; underweight, normal, overweight, obese), and self-reported type 2 diabetes (time-varying according to reported age at diagnosis).

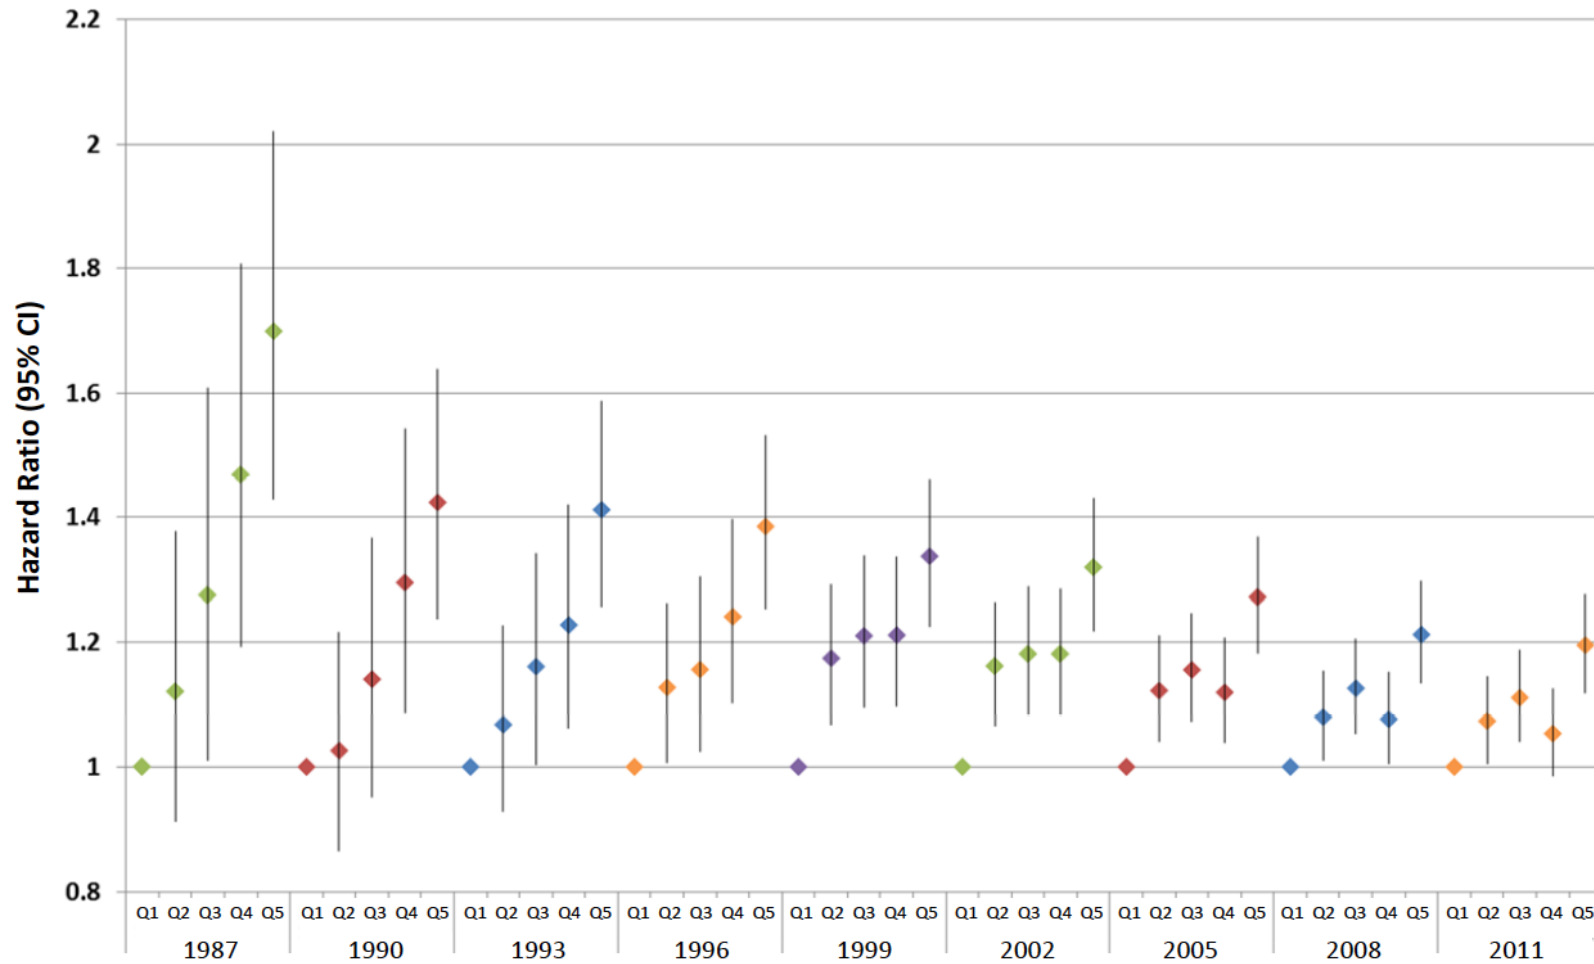

**Figure S7.** HR and 95% CI for hypercholesterolemia, retrospective analysis, yearly exposure, combined cohorts, both genders, all ages, varying end year. Models were stratified by single-year birth year and controlled for gender and the interaction between gender and age. Models also controlled for years of schooling (not time-varying; <12 years, high school diploma/GED, some college, or bachelor's degree or higher), race (white vs. non-white or missing), smoking (time-varying; current, former, none), smoking duration (time varying), smoking pack years (time-varying linear term created by multiplying the self-reported number of packs smoked per day by the smoking duration to that point), regular alcohol consumption (time-varying; current, former, none), BMI (at time of first study survey; underweight, normal, overweight, obese), and self-reported type 2 diabetes (time-varying according to reported age at diagnosis).



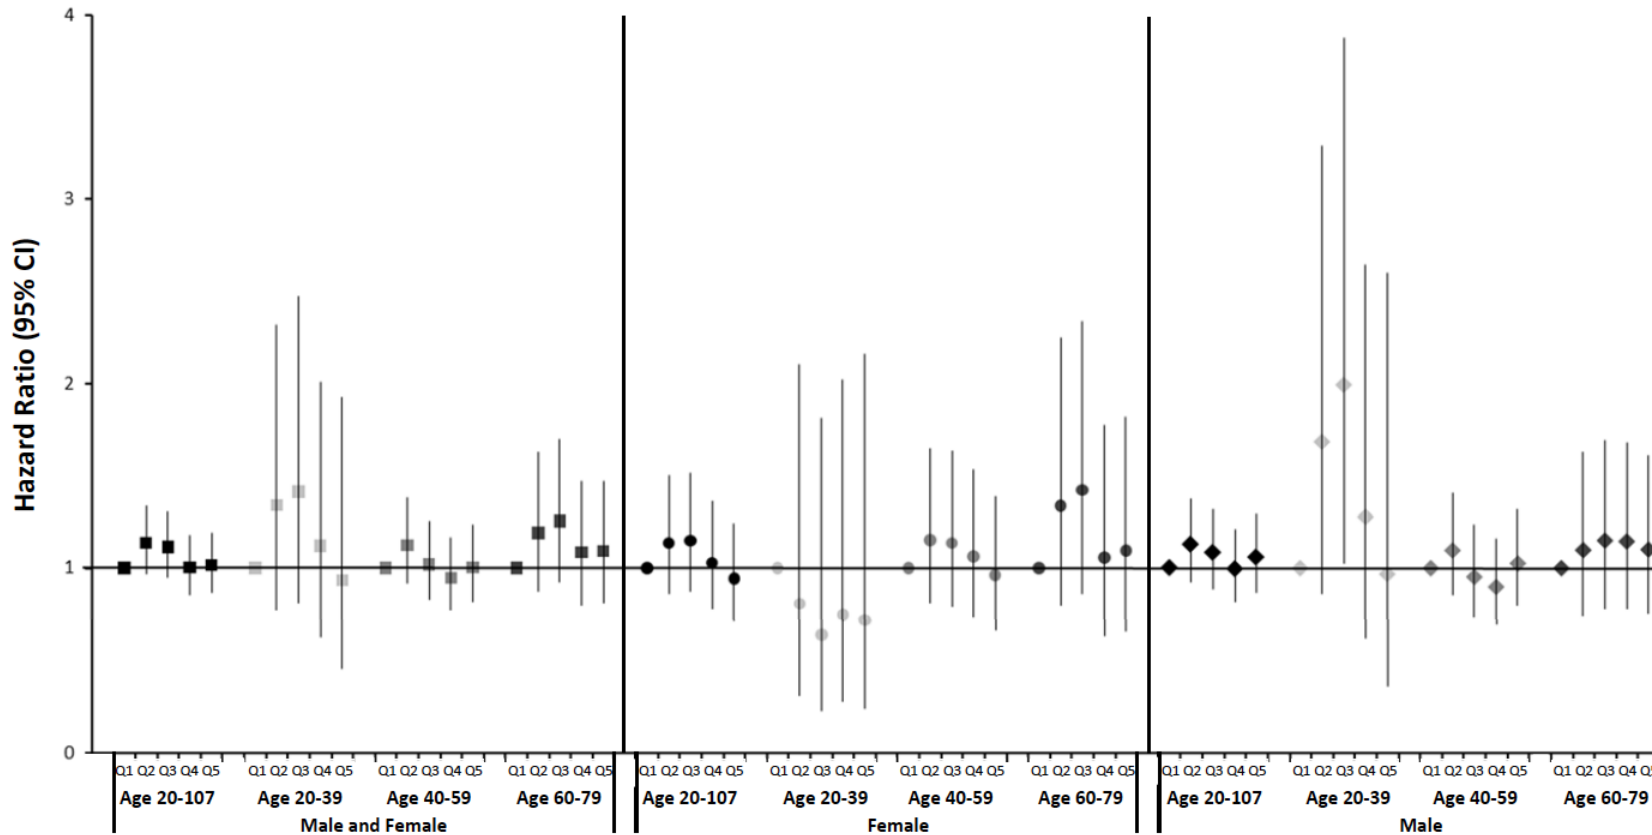

**Figure S8.** HR and 95% CI for coronary artery disease, retrospective analysis, cumulative exposure, community cohort only. Models were stratified by single-year birth year and were either stratified by gender or controlled for gender and the interaction between gender and age. Models also controlled for years of schooling (not time-varying; <12 years, high school diploma/GED, some college, or bachelor’s degree or higher), race (white vs. non-white or missing), smoking (time-varying; current, former, none), smoking duration (time varying), smoking pack years (time-varying linear term created by multiplying the self-reported number of packs smoked per day by the smoking duration to that point), regular alcohol consumption (time-varying; current, former, none), BMI (at time of first study survey; underweight, normal, overweight, obese), and self-reported type 2 diabetes (time-varying according to reported age at diagnosis).

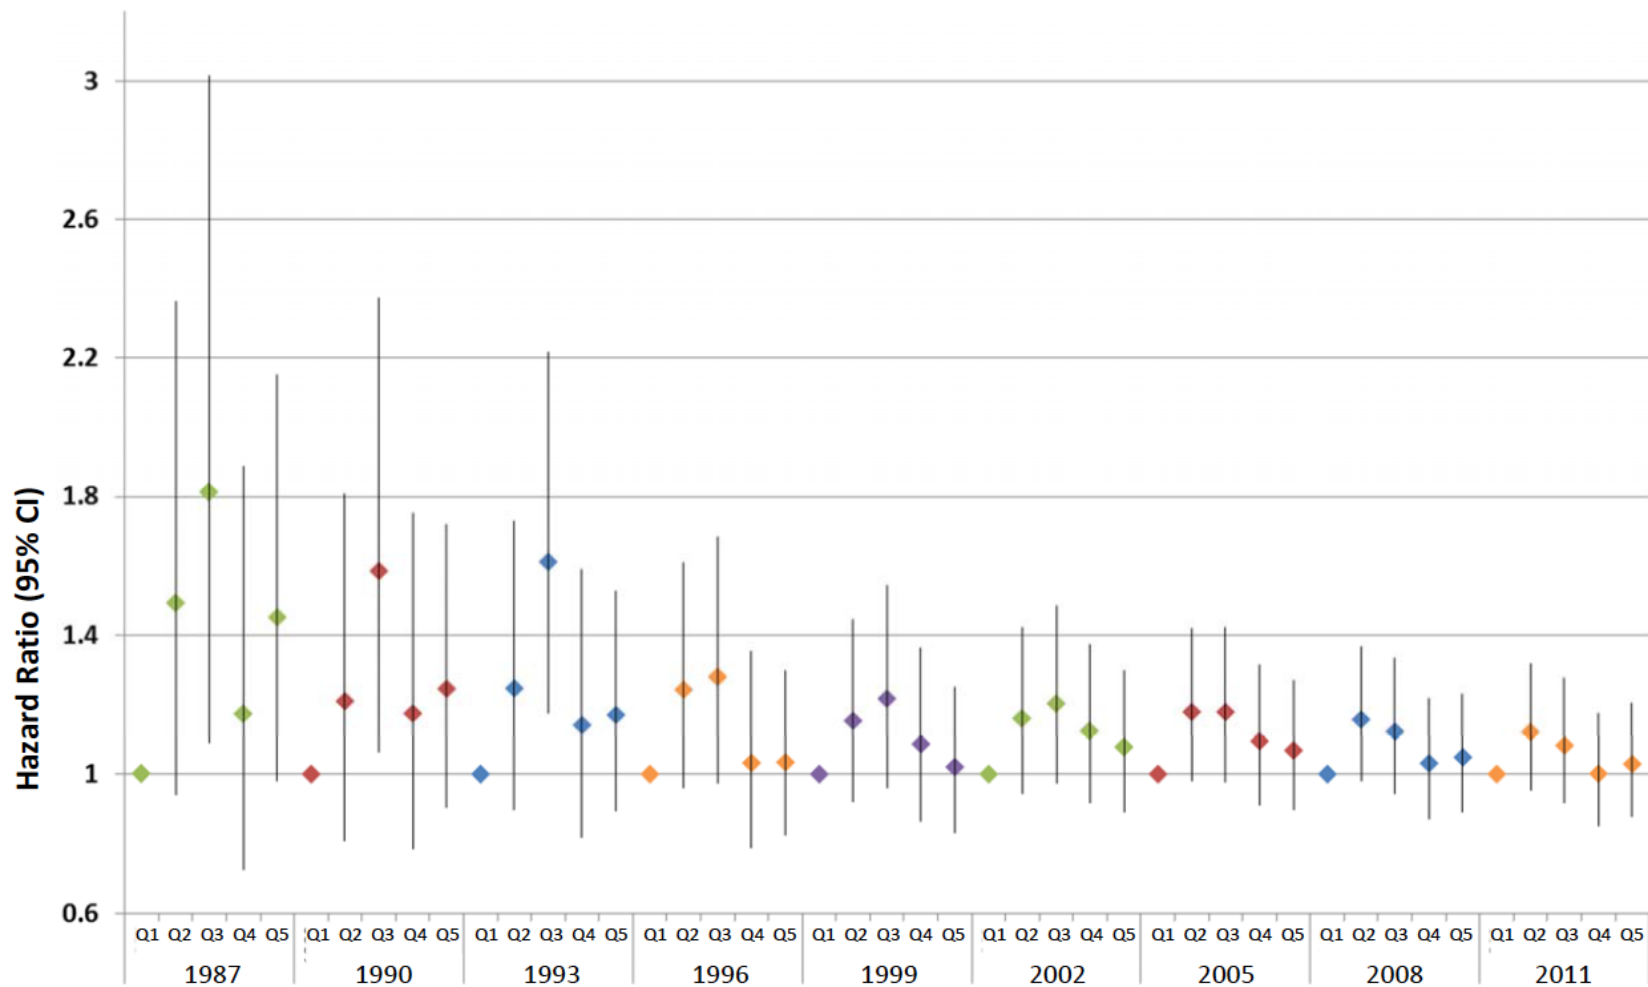

**Figure S9.** HR and 95% CI for coronary artery disease, retrospective analysis, yearly exposure, combined cohorts, men only, all ages, varying end year. Models were stratified by single-year birth year and were restricted to men. Models controlled for years of schooling (not time-varying; <12 years, high school diploma/GED, some college, or bachelor’s degree or higher), race (white vs. non-white or missing), smoking (time-varying; current, former, none), smoking duration (time varying), smoking pack years (time-varying linear term created by multiplying the self-reported number of packs smoked per day by the smoking duration to that point), regular alcohol consumption (time-varying; current, former, none), BMI (at time of first study survey; underweight, normal, overweight, obese), and self-reported type 2 diabetes (time-varying according to reported age at diagnosis).
